# Supplementary material for: Adipose-Derived Mesenchymal Stem Cells do not Affect the Invasion and Migration Potential of Oral Squamous Carcinoma Cells
Source: MDPI journal article supplement (doi:10.3390/ijms21186455), 2020-09-04
Supplement: s1 [file s1]

**Supplementary Table S1.** HSC-3 cells grown in conditioned media from AT-MSCs and BM-MSCs: quantitative PCR (raw data).

| Conditioned media <sup>1</sup> | Ct (mean) | Ct (SD) <sup>2</sup> | RPLP0 Ct (mean) <sup>3</sup> | RPLP0 Ct (SD) | 2 <sup>-ddCt</sup> <sup>4</sup> | 2 <sup>-ddCt</sup> |       |
|--------------------------------|-----------|----------------------|------------------------------|---------------|---------------------------------|--------------------|-------|
|                                |           |                      |                              |               |                                 | mean               | SD    |
| ICAM1                          |           |                      |                              |               |                                 |                    |       |
| Control                        | 23.822    | 0.030                | 17.443                       | 0.123         | 1.000                           | 1                  | -     |
| A16-06                         | 23.655    | 0.009                | 17.074                       | 0.067         | 0.869                           | 0.993              | 0.175 |
| A18-01                         | 23.174    | 0.065                | 16.954                       | 0.077         | 1.117                           |                    |       |
| BMSC1608                       | 24.439    | 0.084                | 17.436                       | 0.140         | 0.649                           | 0.700              | 0.072 |
| BMSC1609                       | 23.844    | 0.108                | 17.051                       | 0.013         | 0.751                           |                    |       |
| ITGA3                          |           |                      |                              |               |                                 |                    |       |
| Control                        | 19.775    | 0.080                | 17.443                       | 0.123         | 1.000                           | 1                  | -     |
| A16-06                         | 19.521    | 0.078                | 17.074                       | 0.067         | 0.923                           | 0.979              | 0.079 |
| A18-01                         | 19.237    | 0.033                | 16.954                       | 0.077         | 1.035                           |                    |       |
| BMSC1608                       | 20.151    | 0.069                | 17.436                       | 0.140         | 0.767                           | 0.859              | 0.131 |
| BMSC1609                       | 19.455    | 0.086                | 17.051                       | 0.013         | 0.952                           |                    |       |
| MMP1                           |           |                      |                              |               |                                 |                    |       |
| Control                        | 22.637    | 0.104                | 17.443                       | 0.123         | 1.000                           | 1                  | -     |
| A16-06                         | 22.094    | 0.119                | 17.074                       | 0.067         | 1.128                           | 1.395              | 0.377 |
| A18-01                         | 21.416    | 0.058                | 16.954                       | 0.077         | 1.661                           |                    |       |
| BMSC1608                       | 22.022    | 0.037                | 17.436                       | 0.140         | 1.524                           | 2.581              | 1.495 |
| BMSC1609                       | 20.382    | 0.151                | 17.051                       | 0.013         | 3.638                           |                    |       |

<sup>1</sup> A-prefixed samples were grown in AT-MSC derived conditioned media, while BMSC-prefixed samples were grown in BM-MSC derived conditioned media. Serum-free growth media was the control sample to whose Ct values the gene expression was normalized to.

<sup>2</sup> SD = standard deviation

<sup>3</sup> *RPLP0* is the housekeeping gene. Its Ct values are the same against each gene.

<sup>4</sup>  $2^{-\Delta\Delta Ct}$  refers to the fold-change in gene expression. Calculations are not shown here but can be calculated from the provided data.

**Supplementary Table S2.** AT-MSCs and BM-MSCs grown in HSC-3 derived conditioned media: quantitative PCR (raw data).

| Cell type and condition <sup>1</sup> | Ct (mean) | Ct SD <sup>2</sup> | <i>RPLP0</i> Ct (mean) <sup>3</sup> | <i>RPLP0</i> Ct SD | 2 <sup>-ddCt</sup> <sub>4</sub> | Mean 2 <sup>-ddCt</sup> | SD 2 <sup>-ddCt</sup> |
|--------------------------------------|-----------|--------------------|-------------------------------------|--------------------|---------------------------------|-------------------------|-----------------------|
| <i>ICAM1</i>                         |           |                    |                                     |                    |                                 |                         |                       |
| A16-06 SF                            | 26.982    | 0.260              | 16.922                              | 0.108              | 1.000                           | 13.977                  | 2.0x10 <sup>-14</sup> |
| A16-06 HSC-3                         | 22.658    | 0.243              | 16.403                              | 0.176              | <b>13.977</b>                   |                         |                       |
| A18-01 SF                            | 26.033    | 0.290              | 15.912                              | 0.069              | 1.000                           |                         |                       |
| A18-01 HSC-3                         | 22.120    | 0.286              | 15.804                              | 0.412              | <b>13.977</b>                   |                         |                       |
| BMSC1608 SF                          | 25.773    | 0.115              | 16.629                              | 0.182              | 1.000                           | 5.483                   | 1.787                 |
| BMSC1608 HSC-3                       | 23.205    | 0.412              | 16.815                              | 0.300              | <b>6.746</b>                    |                         |                       |
| BMSC1609 SF                          | 24.552    | 0.122              | 16.695                              | 0.283              | 1.000                           |                         |                       |
| BMSC1609 HSC-3                       | 22.148    | 0.017              | 16.368                              | 0.295              | <b>4.219</b>                    |                         |                       |
| <i>ITGA3</i>                         |           |                    |                                     |                    |                                 |                         |                       |
| A16-06 SF                            | 26.946    | 0.468              | 16.922                              | 0.108              | 1.000                           | 1.041                   | 0.123                 |
| A16-06 HSC-3                         | 29.020    | 3.329              | 16.403                              | 0.176              | <b>0.954</b>                    |                         |                       |
| A18-01 SF                            | 27.248    | 0.025              | 15.912                              | 0.069              | 1.000                           |                         |                       |
| A18-01 HSC-3                         | 26.967    | 0.044              | 15.804                              | 0.412              | <b>1.127</b>                    |                         |                       |
| BMSC1608 SF                          | 22.909    | 0.037              | 16.629                              | 0.182              | 1.000                           | 0.803                   | 0.281                 |
| BMSC1608 HSC-3                       | 23.093    | 0.187              | 16.815                              | 0.300              | <b>1.001</b>                    |                         |                       |
| BMSC1609 SF                          | 22.009    | 0.146              | 16.695                              | 0.283              | 1.000                           |                         |                       |
| BMSC1609 HSC-3                       | 22.410    | 0.258              | 16.368                              | 0.295              | <b>0.604</b>                    |                         |                       |
| <i>MMP1</i>                          |           |                    |                                     |                    |                                 |                         |                       |
| A16-06 SF                            | 30.400    | 0.130              | 16.922                              | 0.108              | 1.000                           | 32.843                  | 34.958                |
| A16-06 HSC-3                         | 26.859    | 0.287              | 16.403                              | 0.176              | <b>8.124</b>                    |                         |                       |
| A18-01 SF                            | 30.123    | 0.316              | 15.912                              | 0.069              | 1.000                           |                         |                       |
| A18-01 HSC-3                         | 24.167    | 0.185              | 15.804                              | 0.412              | <b>57.562</b>                   |                         |                       |
| BMSC1608 SF                          | 32.305    | 0.340              | 16.629                              | 0.182              | 1.000                           | 31.267                  | 35.506                |
| BMSC1608 HSC-3                       | 26.674    | 0.098              | 16.815                              | 0.300              | <b>56.373</b>                   |                         |                       |
| BMSC1609 SF                          | 27.358    | 0.215              | 16.695                              | 0.283              | 1.000                           |                         |                       |
| BMSC1609 HSC-3                       | 24.408    | 0.090              | 16.368                              | 0.295              | <b>6.161</b>                    |                         |                       |

<sup>1</sup> SF refers to cells grown in serum-free media (control) and HSC-3 refers to cells grown in HSC-3 derived conditioned media.

<sup>2</sup> SD = standard deviation

<sup>3</sup> *RPLP0* is the housekeeping gene. Its Ct values are the same against each gene.

<sup>4</sup> 2<sup>-ddCt</sup> refers to the fold-change in gene expression. Calculations are not shown here.
